# Supplementary material for: Marketed Quinoa (Chenopodium quinoa Willd.) Seeds: A Mycotoxin-Free Matrix Contaminated by Mycotoxigenic Fungi
Source: MDPI journal article supplement (doi:10.3390/pathogens12030418), 2023-03-06
Supplement: s1 [file s1]

## SUPPLEMENTARY MATERIAL

**Table S1.** Primers sequences, products sizes and annealing temperatures used in PCR assays for the identification of the different fungal genera associated with the marketed quinoa seed samples.

| Locus         | Primer         | Sequences (5' – 3')           | Product size (bp) | Annealing temp. (°C) | References |
|---------------|----------------|-------------------------------|-------------------|----------------------|------------|
| <i>ACT</i>    | ACT-512F (Fw)  | ATGTGCAAGGCCGTTTCGC           | 300               | 61                   | 41         |
|               | ACT-783R(Bw)   | TACGAGTCCTTCTGGCCCAT          |                   |                      |            |
| <i>BenA</i>   | Bt2a (Fw)      | GGTAACCAAATCGGTGCTGCTTTC      | 550               | 55                   | 42         |
|               | Bt2b (Bw)      | ACCCTCAGTGTAGTGACCTTGGC       |                   |                      |            |
| <i>CaM</i>    | CMD5 (Fw)      | CCGAGTACAAGGARGCCTTC          | 500               | 55                   | 44         |
|               | CMD6 (Bw)      | CCGATRGAGGTCATRACGTGG         |                   |                      |            |
| <i>ITS</i>    | ITS1 (Fw)      | TCCGTAGGTGAACCTGCGG           | 500               | 57                   | 40         |
|               | ITS4 (Bw)      | TCCTCCGCTTATTGATATGC          |                   |                      |            |
| <i>RPB2</i>   | fRPB2- 5F (Fw) | GAYGAYMGWGATCAYTTYGG          | 1220              | 48-51                | 43         |
|               | fRPB2- 7cR(Bw) | CCCATRGCTTGYTTRCCCAT          |                   |                      |            |
| <i>TEF1-α</i> | EF1 (Fw)       | ATGGGTAAGGA(A/G)GACAAGAC      | 700               | 53                   | 36,38      |
|               | EF2 (Bw)       | GGA(G/A)GTACCACT(G/C)ATCATGTT |                   |                      |            |

**Table S2.** Cycling profiles used for the fungal genomic DNA amplification in the PCR assays.

| Locus         | 1 step               |               | 35 steps*     |               | 1 step          | References |
|---------------|----------------------|---------------|---------------|---------------|-----------------|------------|
|               | Initial denaturation | Denaturation  | Annealing     | Extension     | Final extension |            |
| <i>ACT</i>    | 95 °C x 4 min        | 94 °C x 45 s  | 60 °C x 40 s  | 72 °C x 1 min | 72 °C x 10 min  | 41         |
| <i>BenA</i>   | 95 °C x 4 min        | 94 °C x 1 min | 67 °C x 1 min | 72 °C x 1 min | 72 °C x 10 min  | 45         |
| <i>CaM</i>    | 95 °C x 4 min        | 95 °C x 1 min | 55 °C x 1 min | 72 °C x 2 min | 72 °C x 8 min   | 45         |
| <i>ITS</i>    | 95 °C x 3 min        | 94 °C x 45 s  | 57 °C x 50 s  | 72 °C x 1 min | 72 °C x 10 min  | 45         |
| <i>RPB2</i>   | 95 °C x 5 min        | 95 °C x 1 min | 47 °C x 1 min | 72 °C x 2 min | 72 °C x 10 min  | 43         |
| <i>TEF1-α</i> | 94 °C x 5 min        | 94 °C x 60 s  | 53 °C x 1 min | 72 °C x 1 min | 72 °C x 10 min  | 36         |

\*For *TEF1-α* gene amplification of *Fusarium* spp., 30 cycles of amplification were performed.

**Table S3.** *Alternaria* spp. isolates used in the phylogenetic analysis and related GenBank accession numbers.

| Isolates <sup>1</sup>   | Species                       | GenBank accession numbers |                 |
|-------------------------|-------------------------------|---------------------------|-----------------|
|                         |                               | <i>ITS</i>                | <i>RPB2</i>     |
| CBS 534.83              | <i>Alternaria abundans</i>    | JN383485                  | KC584448        |
| CBS 916.96 <sup>T</sup> | <i>Alternaria alternata</i>   | AF347031                  | KC584375        |
| CBS 119396              | <i>Alternaria alternarina</i> | KR425581                  | JQ905199        |
| CBS 102605              | <i>Alternaria arborescens</i> | NR135927                  | KC584377        |
| CBS 210.86 <sup>T</sup> | <i>Alternaria infectoria</i>  | DQ323697                  | KC584404        |
| CBS 115269              | <i>Alternaria aspera</i>      | KC584242                  | KC584474        |
| AC90                    | <i>Alternaria atra</i>        | LC440624                  | LC476833        |
| CBS 200.67 <sup>T</sup> | <i>Alternaria chartarum</i>   | AF229488                  | KC584481        |
| CBS 918.96              | <i>Alternaria tenuissima</i>  | AF347032                  | KC584435        |
| Q 54                    | <i>Alternaria arborescens</i> | <b>OM892836</b>           | <b>OM908530</b> |
| Q 113                   | <i>Alternaria alternata</i>   | <b>OM892837</b>           | <b>OM908531</b> |
| Q 132                   | <i>Alternaria abundans</i>    | <b>OM892838</b>           | <b>OM908532</b> |
| Q 149                   | <i>Alternaria infectoria</i>  | <b>OM892839</b>           | <b>OM908533</b> |
| Q 178                   | <i>Alternaria chartarum</i>   | <b>OM892840</b>           | <b>OM908534</b> |
| Q180                    | <i>Alternaria chartarum</i>   | <b>OM892841</b>           | <b>OM908535</b> |
| Q 184                   | <i>Alternaria alternata</i>   | <b>OM892842</b>           | <b>OM908536</b> |
| CBS 191.86 <sup>T</sup> | <i>Stemphyllum herbarum</i>   | KC584239                  | KC584471        |

<sup>1</sup>CBS: Culture collection of the Centraalbureau voor Schimmelcultures, Fungal Biodiversity Centre, Utrecht, the Netherlands; Q: isolates obtained from the present study and deposited in the fungal culture collection of the Department of Agricultural, Food and Environmental Sciences, University of Perugia, Perugia, Italy. Bold type, GenBank accession numbers of these isolates. T= Type strain.

**Table S4.** *Penicillium* spp. isolates used in the phylogenetic analysis and related GenBank accession numbers.

| Isolates <sup>1</sup> | Species                             | GenBank accession numbers |                 |
|-----------------------|-------------------------------------|---------------------------|-----------------|
|                       |                                     | <i>RPB2</i>               | <i>ITS</i>      |
| CBS 321.59            | <i>Penicillium aeneum</i>           | KP064573                  | KP016812        |
| CBS 324.89            | <i>Penicillium aurantiogriseum</i>  | JN406573                  | JN942751        |
| CBS 257.29            | <i>Penicillium brevicompactum</i>   | JN406594                  | KF465776        |
| CBS 300.48            | <i>Penicillium canescens</i>        | JN121485                  | MH856353        |
| F 727                 | <i>Penicillium cellarium</i>        | KM249117                  | KM249068        |
| CBS 126236            | <i>Penicillium chrysogenum</i>      | JN606624                  | MH863992        |
| CBS 306.48            | <i>Penicillium chrysogenum</i>      | JN121487                  | MH856357        |
| CBS 321.59            | <i>Penicillium citreonigrum</i>     | KP064573                  | MH857876        |
| CBS 139158            | <i>Penicillium citreosulfuratum</i> | KP064678                  | JX140939        |
| CBS 139162            | <i>Penicillium citreosulfuratum</i> | KP 064679                 | JX140940        |
| CBS 139.45            | <i>Penicillium citrinum</i>         | JF417416                  | MH856132        |
| CBS 312.48            | <i>Penicillium corylophilum</i>     | KP064631                  | MH856360        |
| CBS 115503            | <i>Penicillium crustosum</i>        | MN969114                  | MH862985        |
| CBS 110412            | <i>Penicillium dipodomyis</i>       | JX996474                  | MH862862        |
| CBS 325.48            | <i>Penicillium expansum</i>         | JF417427                  | AB479309        |
| CBS 419.89            | <i>Penicillium flavigenum</i>       | JF909939                  | MH862182        |
| CBS 101486            | <i>Penicillium freii</i>            | JN606624                  | JN942735        |
| CBS 135.41            | <i>Penicillium hirsutum</i>         | JN406629                  | MH856088        |
| CBS 221.28            | <i>Penicillium jaczewskii</i>       | JN406612                  | MH854991        |
| CBS 161.81            | <i>Penicillium murcianum</i>        | MN969202                  | MN431400        |
| 5158                  | <i>Penicillium nordicum</i>         | KJ527378                  | KJ527448        |
| CBS 222.28            | <i>Penicillium polonicum</i>        | JN985417                  | JN942711        |
| CBS 367.48            | <i>Penicillium restrictum</i>       | JN121506                  | MH856396        |
| CBS 129667            | <i>Penicillium rubens</i>           | JX996658                  | JX997057        |
| CBS 424.89            | <i>Penicillium solitum</i>          | KU904363                  | MH860945        |
| PUMCH_Q141            | <i>Penicillium toxicarium</i>       | MW122813                  | MT940755        |
| CBS 603.74            | <i>Penicillium verrucosum</i>       | JN121539                  | AB479317        |
| CBS 390.48            | <i>Penicillium viridicatum</i>      | JN121511                  | FJ613113        |
| Q 5                   | <i>Penicillium verrucosum</i>       | <b>OM908537</b>           | <b>OM892850</b> |
| Q 9                   | <i>Penicillium chrysogenum</i>      | <b>OM908538</b>           | <b>OM892851</b> |
| Q 35                  | <i>Penicillium toxicarium</i>       | <b>OM908540</b>           | <b>OM892853</b> |
| Q 39                  | <i>Penicillium dipodomyis</i>       | <b>OM908541</b>           | <b>OM892854</b> |
| Q 145                 | <i>Penicillium polonicum</i>        | <b>OM908542</b>           | <b>OM892855</b> |
| Q 181                 | <i>Penicillium chrysogenum</i>      | <b>OM908543</b>           | <b>OM892856</b> |
| CBS 310.38            | <i>Talaromyces flavus</i>           | JF417426                  | JN899360        |

<sup>1</sup>CBS: Culture collection of the Centraalbureau voor Schimmelcultures, Fungal Biodiversity Centre, Utrecht, the Netherlands; Q: isolates obtained from the present study and deposited in the fungal culture collection of the Department of Agricultural, Food and Environmental Sciences, University of Perugia, Perugia, Italy. Bold type, GenBank accession numbers of these isolates.

**Table S5.** *Aspergillus* spp. isolates used in the phylogenetic analysis and related GenBank accession numbers.

| Isolates <sup>1</sup>   | Species                          | GenBank accession numbers |                 |
|-------------------------|----------------------------------|---------------------------|-----------------|
|                         |                                  | <i>BenA</i>               | <i>CaM</i>      |
| CBS 557.65 <sup>T</sup> | <i>Aspergillus awamori</i>       | AY820001                  | AJ964874        |
| CBS 101740 <sup>T</sup> | <i>Aspergillus brasiliensis</i>  | AY820006                  | AM295175        |
| CBS 111.26 <sup>T</sup> | <i>Aspergillus carbonarius</i>   | AY585532                  | AJ964873        |
| CBS 115574 <sup>T</sup> | <i>Aspergillus costaricensis</i> | AY820014                  | EU163268        |
| DTO 321_G4              | <i>Aspergillus creber</i>        | ON807807                  | ON807944        |
| NRRL 227 <sup>T</sup>   | <i>Aspergillus cvjetkovicii</i>  | EF652264                  | EF652352        |
| CBS 122712 <sup>T</sup> | <i>Aspergillus eucalypticola</i> | EU482435                  | EU482433        |
| NRRL 302 <sup>T</sup>   | <i>Aspergillus flavipes</i>      | EU014085                  | EF669549        |
| CBS 100927 <sup>T</sup> | <i>Aspergillus flavus</i>        | EF661485                  | EF661508        |
| CBS 133.61 <sup>T</sup> | <i>Aspergillus fumigatus</i>     | EF669791                  | EF669860        |
| NRRL 58600 <sup>T</sup> | <i>Aspergillus jensenii</i>      | JN854007                  | JN854046        |
| NRRL225                 | <i>Aspergillus jensenii</i>      | JN854000                  | JN854020        |
| UTHSC 09-425            | <i>Aspergillus jensenii</i>      | LN898858                  | LN898781        |
| CBS 589.65 <sup>T</sup> | <i>Aspergillus nidulans</i>      | EF652251                  | EF652339        |
| CBS 554.65 <sup>T</sup> | <i>Aspergillus niger</i>         | AY585536                  | AJ964872        |
| CBS 115.27 <sup>T</sup> | <i>Aspergillus niveus</i>        | EF669528                  | EF669573        |
| CBS 108.08 <sup>T</sup> | <i>Aspergillus ochraceous</i>    | EF661322                  | EF661381        |
| CBS 100926 <sup>T</sup> | <i>Aspergillus parasiticus</i>   | EF661481                  | EF661516        |
| CBS 112811 <sup>T</sup> | <i>Aspergillus piperis</i>       | AY20013                   | EU163267        |
| CBS 756.74 <sup>T</sup> | <i>Aspergillus pseudoflectus</i> | EF652331                  | EF652419        |
| CBS 593.65 <sup>T</sup> | <i>Aspergillus sydowii</i>       | EF652274                  | EF652362        |
| CBS 103.14 <sup>T</sup> | <i>Aspergillus tamarii</i>       | EF661474                  | EF661526        |
| CBS 134.48 <sup>T</sup> | <i>Aspergillus tubingensis</i>   | AY820007                  | AJ964876        |
| CBS 113365 <sup>T</sup> | <i>Aspergillus vadensis</i>      | AY585531                  | EU163269        |
| CBS 139.54 <sup>T</sup> | <i>Aspergillus welwitschiae</i>  | FJ629291                  | KC480196        |
| Q 29                    | <i>Aspergillus jensenii</i>      | <b>OM974258</b>           | <b>OM974262</b> |
| Q 49                    | <i>Aspergillus fumigatus</i>     | <b>OM974259</b>           | <b>OM974263</b> |
| Q 73                    | <i>Aspergillus tubingensis</i>   | <b>OM974260</b>           | <b>OM974264</b> |
| Q 146                   | <i>Aspergillus flavus</i>        | <b>OM974261</b>           | <b>OM974265</b> |
| CBS 310.38 <sup>T</sup> | <i>Talaromyces flavus</i>        | JX494302                  | KF741949        |

<sup>1</sup>CBS: Culture collection of the Centraalbureau voor Schimmelmcultures, Fungal Biodiversity Centre, Utrecht, the Netherlands; NRRL: Mycological collection of the National Regional Research Laboratory, Peoria, IL, USA. Q: isolates obtained from the present study and deposited in the fungal culture collection of the Department of Agricultural, Food and Environmental Sciences, University of Perugia, Perugia, Italy. Bold type, GenBank accession numbers of these isolates. T= Type strain.

**Table S6.** *Cladosporium* spp. isolates used in the phylogenetic analysis and related GenBank accession numbers.

| Isolates <sup>1</sup>         | Species                                   | GenBank accession number |                 |
|-------------------------------|-------------------------------------------|--------------------------|-----------------|
|                               |                                           | ITS                      | ACT             |
| <b>CBS 121624<sup>T</sup></b> | <i>Cladosporium allicinum</i>             | EF679350                 | EF679502        |
| <b>CBS 125984<sup>T</sup></b> | <i>Cladosporium australiense</i>          | HM147999                 | HM148486        |
| <b>CBS 112388<sup>T</sup></b> | <i>Cladosporium cladosporioides</i>       | HM148003                 | HM148490        |
| <b>CPC 10142</b>              | <i>Cladosporium cladosporioides</i>       | HM148015                 | HM148502        |
| <b>CBS 143361</b>             | <i>Cladosporium. parasubtilissimum</i>    | MF473170                 | MF474018        |
| <b>CBS 125993</b>             | <i>Cladosporium pseudocladosporioides</i> | HM148158                 | HM148647        |
| <b>CBS 139572</b>             | <i>Cladosporium uwebraunianum</i>         | KP701873                 | KP701996        |
| <b>CBS 121621<sup>T</sup></b> | <i>Cladosporium herbarum</i>              | EF679363                 | EF679516        |
| <b>Q 55</b>                   | <i>Cladosporium cladosporioides</i>       | <b>OM892843</b>          | <b>OM906941</b> |
| <b>Q 61</b>                   | <i>Cladosporium allicinum</i>             | <b>OM892844</b>          | <b>OM906942</b> |
| <b>Q 77</b>                   | <i>Cladosporium. parasubtilissimum</i>    | <b>OM892845</b>          | <b>OM906943</b> |
| <b>Q 92</b>                   | <i>Cladosporium pseudocladosporioides</i> | <b>OM892846</b>          | <b>OM906944</b> |
| <b>Q 111</b>                  | <i>Cladosporium uwebraunianum</i>         | <b>OM892847</b>          | <b>OM906945</b> |
| <b>Q 131</b>                  | <i>Cladosporium pseudocladosporioides</i> | <b>OM892848</b>          | <b>OM906946</b> |
| <b>Q 162</b>                  | <i>Cladosporium cladosporioides</i>       | <b>OM892849</b>          | <b>OM906947</b> |
| <b>CBS 116456</b>             | <i>Cercospora beticola</i>                | NR121315                 | AY840458        |

<sup>1</sup>CBS: Culture collection of the Centraalbureau voor Schimmelcultures, Fungal Biodiversity Centre, Utrecht, the Netherlands; CPC: Culture collection of Pedro Crous, housed at CBC; Q: isolates obtained from the present study and deposited in the fungal culture collection of the Department of Agricultural, Food and Environmental Sciences, University of Perugia, Perugia, Italy. Bold type, GenBank accession numbers of these isolates. T= Type strain.

**Table S7.** *Fusarium* spp. isolates used in the phylogenetic analysis and related GenBank accession numbers.

| Isolates <sup>1</sup> | Phylogenetic species            | Genbank accession numbers |
|-----------------------|---------------------------------|---------------------------|
|                       |                                 | <i>TEF1-α</i>             |
| <b>CBS 485.94</b>     | <i>Fusarium acuminatum</i>      | AB674279                  |
| <b>MAFF 239206</b>    | <i>Fusarium avenaceum</i>       | AB674293                  |
| <b>NRRL 25084</b>     | FIESC 29-a                      | JF740715                  |
| <b>NRRL 52758</b>     | FIESC 30-a                      | JF740833                  |
| <b>CBS 144134</b>     | <i>Fusarium oxysporum</i>       | MH485044                  |
| <b>CBS 146.95</b>     | <i>Fusarium sambucinum</i>      | KM231941                  |
| <b>CBS 393.93</b>     | <i>Fusarium tricinctum</i>      | AB674263                  |
| <b>CBS 100312</b>     | <i>Fusarium verticillioides</i> | AB674288                  |
| <b>Q 185</b>          | <i>Fusarium oxysporum</i>       | <b>OM974256</b>           |
| <b>CBS 125552</b>     | <i>Geejayessia cicatricum</i>   | HM626644                  |
| <b>OR 74A</b>         | <i>Neurospora crassa</i>        | XM959775                  |

<sup>1</sup>CBS: Culture collection of the Centraalbureau voor Schimmelcultures, Fungal Biodiversity Centre, Utrecht, the Netherlands; MAFF: Central Bank of the microorganisms section in the Ministry of Agriculture, Forestry and Fisheries GeneBank in Tsukuba, Japan; NRRL: Mycological collection of the National Regional Research Laboratory, Peoria, IL, USA. Q: isolate obtained from the present study and deposited in the fungal culture collection of the Department of Agricultural, Food and Environmental Sciences, University of Perugia, Perugia, Italy. Bold type, GenBank accession number of this isolate.

**Table S8.** *Alternaria*, *Aspergillus*, *Cladosporium*, *Fusarium* and *Penicillium* species reported in the literature at January 2023 on *Chenopodium quinoa*.

| <b>Fungal genus</b> | <b>Fungal species</b>               | <b>Plant material</b> | <b>References</b> |
|---------------------|-------------------------------------|-----------------------|-------------------|
| <i>Alternaria</i>   | <i>Alternaria alternata</i>         | root                  | 48                |
|                     |                                     | seed                  | 52                |
|                     | <i>Alternaria infectoria</i>        | plant                 | 50                |
| <i>Aspergillus</i>  | <i>Aspergillus flavus</i>           | seed                  | 18                |
|                     | <i>Aspergillus fumigatus</i>        | seed                  | 18                |
|                     | <i>Aspergillus niger</i>            | seed                  | 18                |
|                     | <i>Aspergillus oryzae</i>           | seed                  | 18                |
|                     | <i>Aspergillus parasiticus</i>      | seed                  | 18                |
|                     | <i>Aspergillus sidowii</i>          | seed                  | 18                |
|                     |                                     |                       |                   |
| <i>Penicillium</i>  | <i>Penicillium aurantogriseum</i>   | seed                  | 18                |
|                     | <i>Penicillium brevicompactum</i>   | seed, root            | 18,48             |
|                     | <i>Penicillium canescens</i>        | seed                  | 18                |
|                     | <i>Penicillium chrysogenum</i>      | seed                  | 18                |
|                     | <i>Penicillium citrinum</i>         | seed                  | 18                |
|                     | <i>Penicillium commune</i>          | seed                  | 18                |
|                     | <i>Penicillium corylophilum</i>     | seed                  | 18                |
|                     | <i>Penicillium crustosum</i>        | seed                  | 18                |
|                     | <i>Penicillium griseofulvum</i>     | seed                  | 18                |
|                     | <i>Penicillium hirsutum</i>         | seed                  | 18                |
|                     | <i>Penicillium jaczewskii</i>       | seed                  | 18                |
|                     | <i>Penicillium murcianum</i>        | root                  | 48                |
|                     | <i>Penicillium minioletum</i>       | root                  | 48                |
|                     | <i>Penicillium polonicum</i>        | seed                  | 18                |
|                     | <i>Penicillium solitum</i>          | seed                  | 18                |
|                     | <i>Penicillium viridicatum</i>      | seed                  | 18                |
|                     |                                     |                       |                   |
|                     |                                     |                       |                   |
| <i>Fusarium</i>     | <i>Fusarium acuminatum</i>          | plant                 | 49                |
|                     | <i>Fusarium avenaceum</i>           | plant                 | 49                |
|                     | <i>Fusarium brachygibbosum</i>      | seed                  | 55                |
|                     | <i>Fusarium citri</i>               | seed                  | 52                |
|                     | <i>Fusarium culmorum</i>            | plant                 | 53                |
|                     | <i>Fusarium equiseti</i>            | seed                  | 51                |
|                     |                                     | plant                 | 53                |
|                     | <i>Fusarium graminearum</i>         | plant                 | 53                |
|                     | <i>Fusarium oxysporum</i>           | root                  | 48                |
|                     |                                     | plant                 | 53                |
|                     | <i>Fusarium sambucinum</i>          | root                  | 48                |
| <i>Cladosporium</i> | <i>Fusarium tricinctum</i>          | root                  | 48                |
|                     | <i>Cladosporium spp.</i>            | seed                  | 19,18             |
|                     | <i>Cladosporium cladosporioides</i> | panicle               | 54                |

**Table S9.** Average numbers of the fungal colonies of each genus or as total of the isolated fungi obtained from the 25 marked-bought quinoa seed samples.

| Sampl | Metho | Total fungal gener  | <i>Alternaria</i>      | <i>Cladosporium</i>  | <i>Penicillium</i> | <i>Fusarium</i>   | <i>Aspergillus</i> | <i>Others fungal gener</i> |
|-------|-------|---------------------|------------------------|----------------------|--------------------|-------------------|--------------------|----------------------------|
| 1     | TOTAL | 0.5 ± 0,186 abc     | 0 ± 1,46e-06 a         | 0,10 ± 5,96e-02 ab   | 0,10 ± 5,23e-02 ab | 0 ± 1,46e-06 a    | 0 ± 2,05e-06 a     | 0,05 ± 3,40e-02 ab         |
| 1     | PDA   | 0,1 ± 0,098 a B     | 0 ± 4,50e-06 a B       | 0 ± 4,81e-06 a B     | 0 ± 0,0804 a A     | 0 ± 0,0333 a A    | 0 ± 0,0648 a A     | 0,1 ± 0,0715 a A           |
| 1     | DFB   | 0,9 ± 0,295 abc A   | 0,5 ± 1,33e-01 abc A   | 0,2 ± 9,09e-02 abc A | 0,2 ± 0,0804 ab A  | 0 ± 0,0333 a A    | 0 ± 0,0648 a A     | 0 ± 0,0715 a A             |
| 2     | TOTAL | 0,25 ± 0,131 a      | 0 ± 1,46e-06 a         | 0,15 ± 7,30e-02 ab   | 0,05 ± 3,70e-02 a  | 0 ± 1,46e-06 a    | 0 ± 2,05e-06 a     | 0 ± 3,60e-06 a             |
| 2     | PDA   | 0,1 ± 0,098 a A     | 0 ± 4,50e-06 a A       | 0,3 ± 4,81e-06 a A   | 0,1 ± 0,0804 ab A  | 0 ± 0,0333 a A    | 0 ± 0,0648 a A     | 0 ± 0,0715 a A             |
| 2     | DFB   | 0,4 ± 0,197 ab A    | 0,1 ± 5,95e-02 ad A    | 0 ± 4,81e-06 a B     | 0 ± 0,0804 a A     | 0 ± 0,0333 a A    | 0 ± 0,0648 a A     | 0 ± 0,0715 a A             |
| 3     | TOTAL | 0,4 ± 0,167 ab      | 0 ± 1,46e-06 a         | 0,10 ± 5,96e-06 ab   | 0 ± 3,91e-06 a     | 0 ± 1,46e-06 a    | 0 ± 2,05e-06 a     | 0 ± 3,60e-06 a             |
| 3     | PDA   | 0,2 ± 0,139 a A     | 0,2 ± 8,41e-02 abd A   | 0 ± 4,81e-06 a B     | 0 ± 0,0804 a A     | 0 ± 0,0333 a A    | 0 ± 0,0648 a A     | 0 ± 0,0715 a A             |
| 3     | DFB   | 0,6 ± 0,241 ab A    | 0,4 ± 1,19e-01 abcd A  | 0,2 ± 4,81e-06 a A   | 0 ± 0,0804 a A     | 0 ± 0,0333 a A    | 0 ± 0,0648 a A     | 0 ± 0,0715 a A             |
| 4     | TOTAL | 1,8 ± 0,354 bcde    | 0 ± 1,46e-06 a         | 0 ± 7,35e-06 a       | 1,40 ± 1,96e-01 c  | 0 ± 1,46e-06 a    | 0 ± 2,05e-06 a     | 0,4 ± 9,62e-02 bc          |
| 4     | PDA   | 0,6 ± 0,241 ab B    | 0 ± 4,50e-06 a A       | 0 ± 4,81e-06 a A     | 0,3 ± 0,0804 abc B | 0 ± 0,0333 a A    | 0 ± 0,0648 a A     | 0,3 ± 0,0715 a B           |
| 4     | DFB   | 3 ± 0,539 cde A     | 0 ± 4,50e-06 d A       | 0 ± 4,81e-06 a A     | 2,5 ± 0,0804 c A   | 0 ± 0,0333 a A    | 0 ± 0,0648 a A     | 0,5 ± 0,0715 b A           |
| 5     | TOTAL | 1,95 ± 0,368 cde    | 1,55 ± 1,20e-01 b      | 0,05 ± 4,21e-02 ab   | 0,00 ± 3,91e-02 a  | 1,55 ± 1,26e-01 b | 0,2 ± 6,37e-02 ab  | 0 ± 3,60e-06 a             |
| 5     | PDA   | 0,5 ± 0,220 ab B    | 0 ± 4,50e-06 a B       | 0,1 ± 6,43e-02 a A   | 0 ± 0,0804 a A     | 0 ± 0,0333 a B    | 0,4 ± 0,0648 b B   | 0 ± 0,0715 a A             |
| 5     | DFB   | 3,4 ± 0,573 de A    | 0,3 ± 1,03e-01 abcd A  | 0 ± 4,81e-06 a A     | 0 ± 0,0804 a A     | 3,1 ± 0,0333 b A  | 0 ± 0,0648 a A     | 0 ± 0,0715 a A             |
| 6     | TOTAL | 2,6 ± 0,425 d       | 1,40 ± 1,20e-01 b      | 0,40 ± 1,19e-01 ab   | 0,05 ± 3,70e-02 a  | 1,40 ± 1,20e-01 b | 0,05 ± 3,19e-02 ab | 0,55 ± 1,13e-01 c          |
| 6     | PDA   | 0,3 ± 0,170 a B     | 0 ± 4,50e-06 a B       | 0,2 ± 9,09e-02 ab B  | 0,1 ± 0,0804 ab A  | 0 ± 0,0333 a B    | 0 ± 0,0648 a A     | 0 ± 0,0715 a B             |
| 6     | DFB   | 4,9 ± 0,689 de A    | 0,3 ± 1,03e-01 abcd A  | 0,6 ± 1,57e-01 bc A  | 0 ± 0,0804 a A     | 2,8 ± 0,0333 c A  | 0,1 ± 0,0648 a A   | 1,1 ± 0,0715 c A           |
| 7     | TOTAL | 0,5 ± 0,186 abc     | 0 ± 1,46e-06 a         | 0,15 ± 7,30e-02 ab   | 0 ± 3,91e-06 a     | 0 ± 1,46e-06 a    | 0,2 ± 6,37e-02 ab  | 0 ± 3,60e-06 a             |
| 7     | PDA   | 0,6 ± 0,241 ab A    | 0 ± 4,50e-06 a B       | 0,2 ± 9,09e-02 ab A  | 0 ± 0,0804 a A     | 0 ± 0,0333 a A    | 0,4 ± 0,0648 b B   | 0 ± 0,0715 a A             |
| 7     | DFB   | 0,4 ± 0,197 ab A    | 0,3 ± 1,03e-01 abcd A  | 0,1 ± 6,43e-02 ab A  | 0 ± 0,0804 a A     | 0 ± 0,0333 a A    | 0 ± 0,0648 a A     | 0 ± 0,0715 a A             |
| 8     | TOTAL | 0,95 ± 0,257 abcde  | 0 ± 1,46e-06 a         | 0,30 ± 1,03e-01 ab   | 0,20 ± 7,39e-02 ab | 0 ± 1,46e-06 a    | 0,10 ± 4,51e-02 ab | 0,15 ± 5,89e-02 abc        |
| 8     | PDA   | 1,2 ± 0,341 ab A    | 0,1 ± 5,95e-02 ab A    | 0,5 ± 1,44e-01 abc B | 0,4 ± 0,0804 abc B | 0 ± 0,0333 a A    | 0,2 ± 0,0648 ab B  | 0 ± 0,0715 a B             |
| 8     | DFB   | 0,7 ± 0,260 ab A    | 0,3 ± 1,03e-01 abcd A  | 0,1 ± 6,43e-02 ab A  | 0 ± 0,0804 a A     | 0 ± 0,0333 a A    | 0 ± 0,0648 a A     | 0,3 ± 0,0715 ab A          |
| 9     | TOTAL | 0,3 ± 0,144 a       | 0 ± 1,46e-06 a         | 0 ± 7,35e-06 a       | 0,10 ± 5,23e-02 ab | 0 ± 1,46e-06 a    | 0 ± 2,05e-06 a     | 0,20 ± 6,80e-02 abc        |
| 9     | PDA   | 0,6 ± 0,241 03 ab B | 0 ± 4,50e-06 a A       | 0 ± 4,81e-06 a A     | 0,2 ± 0,0804 bc A  | 0 ± 0,0333 a A    | 0 ± 0,0648 a A     | 0,4 ± 0,0715 a B           |
| 9     | DFB   | 0,0 ± 0,001 a A     | 0 ± 4,50e-06 d A       | 0 ± 4,81e-06 a A     | 0 ± 0,0804 a A     | 0 ± 0,0333 a A    | 0 ± 0,0648 a A     | 0 ± 0,0715 a A             |
| 10    | TOTAL | 1,75 ± 0,349 bcde   | 0 ± 1,46e-06 a         | 0,35 ± 1,11e-06 ab   | 0,15 ± 6,40e-02 ab | 0 ± 1,46e-06 a    | 0,2 ± 6,37e-02 ab  | 0,25 ± 6,70e-02 abc        |
| 10    | PDA   | 0,4 ± 0,197 ab B    | 0 ± 4,50e-06 a B       | 0,7 ± 1,70e-01 bc A  | 0,1 ± 0,0804ab A   | 0 ± 0,0333 a A    | 0,3 ± 0,0648 ab B  | 0 ± 0,0715 a B             |
| 10    | DFB   | 3,1 ± 0,548 cde A   | 1,6 ± 2,38e-01 ef A    | 0 ± 4,81e-06 a B     | 0,2 ± 0,0804 ab A  | 0 ± 0,0333 a A    | 0,1 ± 0,0648 a A   | 0,5 ± 0,0715 b A           |
| 11    | TOTAL | 0,25 ± 0,132 a      | 0 ± 4,50e-06 a         | 0,10 ± 5,96e-02 ab   | 0 ± 3,91e-06 a     | 0 ± 1,46e-06 a    | 0,05 ± 3,19e-02 ab | 0,10 ± 4,81e-02 ab         |
| 11    | PDA   | 0,0 ± 0,001 a B     | 0 ± 4,50e-06 a A       | 0 ± 4,81e-06 a A     | 0 ± 0,0804 a A     | 0 ± 0,0333 a A    | 0 ± 0,0648 a A     | 0 ± 0,0715 a B             |
| 11    | DFB   | 0,5 ± 0,220 ab A    | 0 ± 4,50e-06 d A       | 0,2 ± 9,09e-02 abc A | 0 ± 0,0804 a A     | 0 ± 0,0333 a A    | 0,1 ± 0,0648 a A   | 0,2 ± 0,0715 ab A          |
| 12    | TOTAL | 0,4 ± 0,167 ab      | 0 ± 1,46e-06 a         | 0,05 ± 4,21e-02 ab   | 0,05 ± 3,70e-02 a  | 0 ± 1,46e-06 a    | 0 ± 2,05e-06 a     | 0 ± 3,60e-06 a             |
| 12    | PDA   | 0,1 ± 0,098 a B     | 0 ± 4,50e-06 a B       | 0 ± 4,81e-06 a A     | 0,1 ± 0,0804 ab A  | 0 ± 0,0333 a A    | 0 ± 0,0648 a A     | 0 ± 0,0715 a A             |
| 12    | DFB   | 0,7 ± 0,260 ab A    | 0,6 ± 1,460e-01 abce A | 0,1 ± 6,43e-02 ab A  | 0 ± 0,0804 a A     | 0 ± 0,0333 a A    | 0 ± 0,0648 a A     | 0 ± 0,0715 a A             |
| 13    | TOTAL | 0,95 ± 0,257 abcde  | 0 ± 1,46e-06 a         | 0,05 ± 4,21e-02 ab   | 0,55 ± 1,23e-01 b  | 0 ± 1,46e-06 a    | 0 ± 2,05e-06 a     | 0,15 ± 5,89e-02 abc        |
| 13    | PDA   | 0,7 ± 0,260 ab A    | 0,1 ± 5,95e-02 ab A    | 0 ± 4,81e-06 a A     | 0,6 ± 0,0804 c A   | 0 ± 0,0333 a A    | 0 ± 0,0648 a A     | 0 ± 0,0715 a B             |
| 13    | DFB   | 1,2 ± 0,341 abcde A | 0,3 ± 1,03e-01 abcd A  | 0,1 ± 6,43e-02 ab A  | 0,5 ± 0,0804 bd A  | 0 ± 0,0333 a A    | 0 ± 0,0648 a A     | 0,3 ± 0,0715 ab A          |
| 14    | TOTAL | 0,4 ± 0,167 ab      | 0 ± 1,46e-06 a         | 0,20 ± 8,43e-02 ab   | 0,05 ± 3,70e-02 a  | 0 ± 1,46e-06 a    | 0 ± 2,05e-06 a     | 0,05 ± 3,40e-02 ab         |
| 14    | PDA   | 0,2 ± 0,139 a A     | 0 ± 4,50e-06 a B       | 0,1 ± 6,43e-02 a A   | 0,1 ± 0,0804 ab A  | 0 ± 0,0333 a A    | 0 ± 0,0648 a A     | 0 ± 0,0715 a A             |
| 14    | DFB   | 0,6 ± 0,241 ab A    | 0,2 ± 8,41e-02 abd A   | 0,3 ± 1,11e-01 abc A | 0 ± 0,0804 a A     | 0 ± 0,0333 a A    | 0 ± 0,0648 a A     | 0,1 ± 0,0715 a A           |
| 15    | TOTAL | 0,85 ± 0,243 abcde  | 0,05 ± 2,27e-02 a      | 0,50 ± 1,33e-01 b    | 0,10 ± 5,23e-02 ab | 0,05 ± 2,27e-02 a | 0,05 ± 3,19e-02 ab | 0,05 ± 3,40e-02 ab         |
| 15    | PDA   | 0,2 ± 0,139 a B     | 0 ± 4,50e-06 a B       | 0 ± 4,81e-06 a B     | 0,2 ± 0,0804 abc A | 0 ± 0,0333 a B    | 0 ± 0,0648 a A     | 0 ± 0,0715 a A             |
| 15    | DFB   | 1,5 ± 0,381 bce A   | 0,2 ± 8,41e-02 abd A   | 1,0 ± 2,03e-01 c A   | 0 ± 0,0804 a A     | 0,1 ± 0,0333 a A  | 0,1 ± 0,0648 a A   | 0,1 ± 0,0715 a A           |
| 16    | TOTAL | 0,75 ± 0,228 abcde  | 0 ± 1,46e-06 a         | 0 ± 7,35e-06 a       | 0,35 ± 9,78e-02 ab | 0 ± 1,46e-06 a    | 0,3 ± 7,81e-02 b   | 0 ± 3,60e-06 a             |
| 16    | PDA   | 0,6 ± 0,241 ab A    | 0,1 ± 5,95e-02 ab A    | 0 ± 4,81e-06 a A     | 0 ± 0,0804 a B     | 0 ± 0,0333 a A    | 0,5 ± 0,0648 b B   | 0 ± 0,0715 a A             |
| 16    | DFB   | 0,9 ± 0,295 abc A   | 0,1 ± 5,95e-02 ad A    | 0 ± 4,81e-06 a A     | 0,7 ± 0,0804 d A   | 0 ± 0,0333 a A    | 0,1 ± 0,0648 a A   | 0 ± 0,0715 a A             |
| 17    | TOTAL | 2,1 ± 0,382 de      | 0 ± 1,46e-06 a         | 0,50 ± 1,33e-01 b    | 0 ± 3,91e-06 a     | 0 ± 1,46e-06 a    | 0 ± 2,05e-06 a     | 0,10 ± 4,81e-02 ab         |
| 17    | PDA   | 1 ± 0,311 ab B      | 0 ± 4,50e-06 a B       | 1,0 ± 2,03e-01 bc B  | 0 ± 0,0804 a A     | 0 ± 0,0333 a A    | 0 ± 0,0648 a A     | 0 ± 0,0715 a B             |
| 17    | DFB   | 3,2 ± 0,557 cde A   | 3,0 ± 3,26e-01 f A     | 0 ± 4,81e-06 a A     | 0 ± 0,0804 a A     | 0 ± 0,0333 a A    | 0 ± 0,0648 a A     | 0,2 ± 0,0715 ab A          |
| 18    | TOTAL | 0,6 ± 0,204 abc     | 0 ± 1,46e-06 a         | 0,15 ± 7,30e-02 ab   | 0 ± 3,91e-06 a     | 0 ± 1,46e-06 a    | 0 ± 2,05e-06 a     | 0 ± 3,60e-06 a             |
| 18    | PDA   | 0,1 ± 0,098 a B     | 0 ± 4,50e-06 a B       | 0,1 ± 6,43e-02 a A   | 0 ± 0,0804 a A     | 0 ± 0,0333 a A    | 0 ± 0,0648 a A     | 0 ± 0,0715 a A             |
| 18    | DFB   | 1,1 ± 0,326 abcde A | 0,9 ± 1,79e-01 bce A   | 0,2 ± 9,09e-02 abc A | 0 ± 0,0804 a A     | 0 ± 0,0333 a A    | 0 ± 0,0648 a A     | 0 ± 0,0715 a A             |
| 19    | TOTAL | 0,6 ± 0,204 abc     | 0 ± 1,46e-06 a         | 0,20 ± 8,43e-02 ab   | 0 ± 3,91e-06 a     | 0 ± 1,46e-06 a    | 0 ± 2,05e-06 a     | 0,10 ± 4,81e-02 ab         |
| 19    | PDA   | 0 ± 0,001 a B       | 0 ± 4,50e-06 a B       | 0 ± 4,81e-06 a B     | 0 ± 0,0804 a A     | 0 ± 0,0333 a A    | 0 ± 0,0648 a A     | 0 ± 0,0715 a A             |
| 19    | DFB   | 1,2 ± 0,340 abcde A | 0,6 ± 1,460e-01 abce A | 0,4 ± 1,29e-01 abc A | 0 ± 0,0804 a A     | 0 ± 0,0333 a A    | 0 ± 0,0648 a A     | 0,2 ± 0,0715 ab B          |
| 20    | TOTAL | 1,2 ± 0,289 abcde   | 0 ± 1,46e-06 a         | 0,60 ± 1,46e-01 b    | 0,2 ± 7,39e-02 ab  | 0 ± 1,46e-06 a    | 0,10 ± 4,51e-02 ab | 0 ± 3,60e-06 a             |
| 20    | PDA   | 2,1 ± 0,451 b B     | 0,2 ± 8,41e-02 ab A    | 1,1 ± 2,13e-01 c B   | 0,4 ± 0,0804 abc B | 0,2 ± 0,0333 b B  | 0,2 ± 0,0648 ab B  | 0 ± 0,0715 a A             |
| 20    | DFB   | 0,3 ± 0,170 ab A    | 0,2 ± 8,41e-02 abd A   | 0,1 ± 6,43e-02 ab A  | 0 ± 0,0804 a A     | 0 ± 0,0333 a A    | 0 ± 0,0648 a A     | 0 ± 0,0715 a A             |
| 21    | TOTAL | 0,2 ± 0,118 a       | 0 ± 1,46e-06 a         | 0,15 ± 7,30e-02 ab   | 0,05 ± 3,70e-02 a  | 0,1 ± 3,21e-02 a  | 0 ± 2,05e-06 a     | 0 ± 3,60e-06 a             |
| 21    | PDA   | 0,3 ± 0,170 a A     | 0 ± 4,50e-06 a A       | 0,3 ± 1,11e-01 abc B | 0 ± 0,0804 a A     | 0 ± 0,0333 a A    | 0 ± 0,0648 a A     | 0 ± 0,0715 a A             |
| 21    | DFB   | 0,1 ± 0,984 ab A    | 0 ± 4,50e-06 d A       | 0 ± 4,81e-06 a A     | 0,1 ± 0,0804 ab A  | 0 ± 0,0333 a A    | 0 ± 0,0648 a A     | 0 ± 0,0715 a A             |
| 22    | TOTAL | 0,1 ± 0,083 a       | 0 ± 1,46e-06 a         | 0,10 ± 5,96e-02 ab   | 0 ± 3,91e-06 a     | 0 ± 1,46e-06 a    | 0 ± 2,05e-06 a     | 0 ± 3,60e-06 a             |
| 22    | PDA   | 0,2 ± 0,139 a A     | 0 ± 4,50e-06 a B       | 0,2 ± 9,09e-02 ab B  | 0 ± 0,0804 a A     | 0 ± 0,0333 a A    | 0 ± 0,0648 a A     | 0 ± 0,0715 a A             |
| 22    | DFB   | 0 ± 0,001 a A       | 0 ± 4,50e-06 d A       | 0 ± 4,81e-06 a A     | 0 ± 0,0804 a A     | 0 ± 0,0333 a A    | 0 ± 0,0648 a A     | 0 ± 0,0715 a A             |
| 23    | TOTAL | 0,45 ± 0,177 ab     | 0 ± 1,46e-06 a         | 0,05 ± 4,21e-02 ab   | 0,05 ± 3,70e-02 a  | 0 ± 1,46e-06 a    | 0,05 ± 3,19e-02 ab | 0,05 ± 3,40e-02 ab         |
| 23    | PDA   | 0,2 ± 0,139 a A     | 0 ± 4,50e-06 a B       | 0,1 ± 6,43e-02 a A   | 0 ± 0,0804 a A     | 0 ± 0,0333 a A    | 0 ± 0,0648 a A     | 0,1 ± 0,0715 a A           |
| 23    | DFB   | 0,7 ± 0,260 ab A    | 0,5 ± 1,33e-01 abc A   | 0 ± 4,81e-06 a A     | 0,1 ± 0,0804 ab A  | 0 ± 0,0333 a A    | 0,1 ± 0,0648 a A   | 0 ± 0,0715 a A             |
| 24    | TOTAL | 0,1 ± 0,084 a       | 0 ± 1,46e-06 a         | 0 ± 7,35e-06 a       | 0 ± 3,91e-06 a     | 0 ± 1,46e-06 a    | 0,05 ± 3,19e-02 ab | 0 ± 3,60e-06 a             |
| 24    | PDA   | 0 ± 0,001 a A       | 0 ± 4,50e-06 a A       | 0 ± 4,81e-06 a A     | 0 ± 0,0804 a A     | 0 ± 0,0333 a A    | 0 ± 0,0648 a A     | 0 ± 0,0715 a A             |
| 24    | DFB   | 0,2 ± 0,139 ab A    | 0,1 ± 5,95e-02 ad A    | 0 ± 4,81e-06 a A     | 0 ± 0,0804 a A     | 0 ± 0,0333 a A    | 0,1 ± 0,0648 a A   | 0 ± 0,0715 a A             |
| 25    | TOTAL | 0,95 ± 0,257 abcde  | 0 ± 1,46e-06 a         | 0,05 ± 4,21e-02 ab   | 0 ± 3,91e-06 a     | 0 ± 1,46e-06 a    | 0 ± 2,05e-06 a     | 0 ± 3,60e-06 a             |
| 25    | PDA   | 0,8 ± 0,278 ab A    | 0,7 ± 1,57e-01 b A     | 0,1 ± 6,43e-02 a A   | 0 ± 0,0804 a A     | 0 ± 0,0333 a A    | 0 ± 0,0648 a A     | 0 ± 0,0715 a A             |
| 25    | DFB   | 1,1 ± 0,326 abcde A | 1,1 ± 1,97e-01 ce A    | 0 ± 4,81e-06 a A     | 0 ± 0,0804 a A     | 0 ± 0,0333 a A    | 0 ± 0,0648 a A     | 0 ± 0,0715 a A             |

Average numbers of fungal colonies obtained in total (TOTAL) or either by isolation on Potato Dextrose Agar (PDA) or deep-freezing blotter test (DFB) from each market-bought quinoa seed sample as identified by morphological features. For each sample, the TOTAL column represents the average ( $\pm$  SE) of the 20 analyzed plates, each containing 10 seeds, for a total of 200 seeds, PDA and DFB columns represent the average ( $\pm$  SE) of 10 analyzed plates, each containing 10 seeds, for a total of 100 seeds per method. In each column, lowercase letters indicate significant differences ( $p=0.05$ , Tuckey's multiple range test) between samples inside each class (TOTAL, PDA or DFB) and uppercase letters indicate significant differences ( $p=0.05$ , Tuckey's multiple range test) between the two different isolation methods (PDA or DFB) inside each seed sample.

**Table S10.** Results of BLAST analysis.

| Genus               | Isolates | Species resulting from the BLAST analysis of the amplified regions                                                                                                                                                                                                                                                                                                                                                                                                                                                                                                                                                                     |                                                                                                                                                                                                                                                                                                                                                                                                                                                                                                                                                                                                                                                |
|---------------------|----------|----------------------------------------------------------------------------------------------------------------------------------------------------------------------------------------------------------------------------------------------------------------------------------------------------------------------------------------------------------------------------------------------------------------------------------------------------------------------------------------------------------------------------------------------------------------------------------------------------------------------------------------|------------------------------------------------------------------------------------------------------------------------------------------------------------------------------------------------------------------------------------------------------------------------------------------------------------------------------------------------------------------------------------------------------------------------------------------------------------------------------------------------------------------------------------------------------------------------------------------------------------------------------------------------|
|                     |          | ITS                                                                                                                                                                                                                                                                                                                                                                                                                                                                                                                                                                                                                                    | RPB2                                                                                                                                                                                                                                                                                                                                                                                                                                                                                                                                                                                                                                           |
| <i>Alternaria</i>   | Q 54     | <i>A. alstroemeriae</i> , <i>A. alternata</i> , <i>A. tenuissima</i> , <i>A. burnsii</i> , <i>A. brassicola</i> , <i>A. brassicae</i> , <i>A. gaisen</i> , <i>A. arborescens</i> , <i>A. longipes</i> .                                                                                                                                                                                                                                                                                                                                                                                                                                | <i>A. arborescens</i> , <i>A. alternata</i> , <i>A. postmessia</i> , <i>A. tenuissima</i> , <i>A. burnsii</i> , <i>A. yaliinficiens</i> , <i>A. citricancr</i> , <i>A. longipes</i> , <i>A. tectorum</i> , <i>A. setosae</i> , <i>A. daucifolii</i> , <i>A. iridicola</i> , <i>A. maritima</i> , <i>A. gaisen</i> .                                                                                                                                                                                                                                                                                                                            |
|                     | Q 113    | <i>A. alternata</i> , <i>A. angustiovoidea</i> , <i>A. tenuissima</i> , <i>A. compacta</i> , <i>A. brassicae</i> , <i>A. solani</i> , <i>A. alstroemeriae</i> .                                                                                                                                                                                                                                                                                                                                                                                                                                                                        | <i>A. alternata</i> , <i>A. postmessia</i> , <i>A. tenuissima</i> , <i>A. arborescens</i> , <i>A. tectorum</i> .                                                                                                                                                                                                                                                                                                                                                                                                                                                                                                                               |
|                     | Q 132    | <i>A. abundans</i> , <i>A. pobletensis</i> , <i>A. infectoria</i> , <i>A. maloroum</i> , <i>A. rosae</i> .                                                                                                                                                                                                                                                                                                                                                                                                                                                                                                                             | <i>A. abundans</i> , <i>A. armoraciae</i> , <i>A. breviramosa</i> , <i>A. hordeiaustralica</i> , <i>A. dactylidicola</i> , <i>A. incomplexa</i> , <i>A. metachromatica</i> , <i>A. arbusti</i> , <i>A. novae-zelandiae</i> , <i>A. viburni</i> , <i>A. conjuncta</i> , <i>A. triticimaculans</i> , <i>A. infectoria</i> , <i>A. rosae</i> , <i>A. kulundi</i> , <i>A. ventricosa</i> , <i>A. papavericola</i> , <i>A. solani</i> , <i>A. cetera</i> , <i>A. arbusti</i> , <i>A. citricancr</i> .                                                                                                                                               |
|                     | Q 149    | <i>A. infectoria</i> , <i>A. cerasidanica</i> , <i>A. conjuncta</i> , <i>A. hordeicola</i> , <i>A. murispora</i> , <i>A. japonica</i> , <i>A. hordeiaustralica</i> , <i>A. ventricosa</i> .                                                                                                                                                                                                                                                                                                                                                                                                                                            | <i>A. infectoriae</i> , <i>A. alternarina</i> , <i>A. hordeicola</i> , <i>A. californica</i> , <i>A. humuli</i> , <i>A. hampshirensis</i> , <i>A. infectoria</i> , <i>A. slovac</i> , <i>A. triticimaculans</i> .                                                                                                                                                                                                                                                                                                                                                                                                                              |
|                     | Q 178    | <i>A. chartarum</i> , <i>A. alternata</i> , <i>A. aspera</i> , <i>A. brassicaeporri</i> , <i>A. multiformis</i> , <i>A. consortialis</i> , <i>A. terricola</i> .                                                                                                                                                                                                                                                                                                                                                                                                                                                                       | <i>A. atra</i> , <i>A. arborescens</i> , <i>A. postmessia</i> , <i>A. solani</i> , <i>A. alternata</i> , <i>A. metachromatica</i> , <i>A. rosae</i> , <i>A. vaccariae</i> , <i>A. japonica</i> , <i>A. papavericola</i> , <i>A. ethzedia</i> , <i>A. incomplexa</i> , <i>A. arbusti</i> , <i>A. infectoriae</i> , <i>A. ventricosa</i> , <i>A. conjuncta</i> , <i>A. tenuissima</i> , <i>A. horediaustralica</i> , <i>A. viburni</i> , <i>A. zinniae</i> , <i>A. concatenata</i> , <i>A. solani</i> , <i>A. yaliinficiens</i> , <i>A. longipes</i> , <i>A. novae-zelandiae</i> , <i>A. aspera</i> , <i>A. blumeae</i> , <i>A. calendulae</i> . |
|                     | Q180     | <i>A. aspera</i> , <i>A. alternata</i> , <i>A. chartarum</i> , <i>A. brassicae</i> , <i>A. alternata</i> , <i>A. sorghi</i> , <i>A. consortialis</i> , <i>A. terricola</i> , <i>A. cantlous</i> , <i>A. brassicae</i> , <i>A. multiformis</i> .                                                                                                                                                                                                                                                                                                                                                                                        | <i>A. atra</i> , <i>A. arborescens</i> , <i>A. alternata</i> , <i>A. postmessia</i> , <i>A. solani</i> , <i>A. burnsii</i> , <i>A. rosae</i> , <i>A. vaccariae</i> , <i>A. papavericola</i> , <i>A. japonica</i> , <i>A. metachromatica</i> , <i>A. incomplexa</i> , <i>A. ethzedia</i> , <i>A. arbusti</i> , <i>A. infectoria</i> , <i>A. ventricosa</i> , <i>A. citricancr</i> , <i>A. zinniae</i> .                                                                                                                                                                                                                                         |
|                     | Q 184    | <i>A. alternata</i> , <i>A. angustiovoidea</i> , <i>A. tenuissima</i> , <i>A. compacta</i> , <i>A. brassicae</i> , <i>A. solani</i> .                                                                                                                                                                                                                                                                                                                                                                                                                                                                                                  | <i>A. alternata</i> , <i>A. tenuissima</i> , <i>A. postmessia</i> , <i>A. tectorum</i> , <i>A. longipes</i> , <i>A. yaliinficiens</i> , <i>A. citricancr</i> .                                                                                                                                                                                                                                                                                                                                                                                                                                                                                 |
| <i>Penicillium</i>  | Q 5      | <i>P. verrucosum</i> , <i>P. allii</i> , <i>P. albocoremium</i> , <i>P. viridicatum</i> , <i>P. hordei</i> , <i>P. nordicum</i> , <i>P. thomii</i> , <i>P. nooechinulatum</i> , <i>P. christenseniae</i> , <i>P. polonium</i> , <i>P. solitum</i> , <i>P. aurantiogriseum</i> , <i>P. hirsutum</i> , <i>P. cordubense</i> , <i>P. lapidosum</i> .                                                                                                                                                                                                                                                                                      | <i>P. nordicum</i> , <i>P. thymicola</i> , <i>P. freii</i> , <i>P. solitum</i> , <i>P. venetum</i> , <i>P. verrucosum</i> , <i>P. sublectaticum</i> , <i>P. polonicum</i> , <i>P. speluncae</i> , <i>P. aurantiogriseum</i> , <i>P. echinulatum</i> , <i>P. discolor</i> , <i>P. melanoconidium</i> , <i>P. crustosum</i> , <i>P. viridicatum</i> , <i>P. commune</i> , <i>P. cavernicola</i> , <i>P. nooechinulatum</i> .                                                                                                                                                                                                                     |
|                     | Q 9      | <i>P. chrysogenum</i> , <i>P. crustosum</i> , <i>P. griseofulvum</i> , <i>P. rubens</i> , <i>P. aetiophicum</i> , <i>P. commune</i> , <i>P. allii-sativi</i> , <i>P. fimorum</i> .                                                                                                                                                                                                                                                                                                                                                                                                                                                     | <i>P. chrysogenum</i> , <i>P. glycyrrhizicola</i> , <i>P. rubens</i> , <i>P. vanluyki</i> , <i>P. alii-sativi</i> .                                                                                                                                                                                                                                                                                                                                                                                                                                                                                                                            |
|                     | Q 35     | <i>P. aeneum</i> , <i>P. citreonigrum</i> , <i>P. citreosulfuratum</i> , <i>P. toxicarium</i> , <i>P. fundyense</i> .                                                                                                                                                                                                                                                                                                                                                                                                                                                                                                                  | <i>P. citreonigrum</i> , <i>P. fundyense</i> , <i>P. toxicarium</i> , <i>P. citreoviride</i> , <i>P. citreosulfuratum</i> , <i>P. restrictum</i> .                                                                                                                                                                                                                                                                                                                                                                                                                                                                                             |
|                     | Q 39     | <i>P. dipodomys</i> , <i>P. chrysogenum</i> , <i>P. griseofulvum</i> , <i>P. granulatum</i> , <i>P. lanosum</i> , <i>P. flavigenum</i> , <i>P. nalgiovense</i> , <i>P. vinaceum</i> , <i>P. commune</i> .                                                                                                                                                                                                                                                                                                                                                                                                                              | <i>P. dipodomys</i> , <i>P. nalgiovense</i> , <i>P. glycyrrhizicola</i> , <i>P. chrysogenum</i> , <i>P. flavigenum</i> , <i>P. confertum</i> , <i>P. expansum</i> .                                                                                                                                                                                                                                                                                                                                                                                                                                                                            |
|                     | Q 145    | <i>P. polonicum</i> , <i>P. aurantiogriseum</i> , <i>P. cellarum</i> , <i>P. freii</i> , <i>P. christenseniae</i> , <i>P. viridicatum</i> , <i>P. nooechinulatum</i> , <i>P. melanoconidium</i> , <i>P. cyclopium</i> , <i>P. camemberti</i> , <i>P. sublectaticum</i> , <i>P. mali-pumilae</i> , <i>P. tricolor</i> , <i>P. speluncae</i> , <i>P. venetum</i> , <i>P. radicola</i> , <i>P. commune</i> , <i>P. caseifulum</i> , <i>P. tulipae</i> , <i>P. camemberti</i> , <i>P. echinulatum</i> , <i>P. allii</i> , <i>P. biforme</i> , <i>P. discolor</i> , <i>P. thymicolae</i> , <i>P. solitum</i> , <i>P. psychrotrophicum</i> . | <i>P. polonicum</i> , <i>P. aurantiogriseum</i> , <i>P. cellarum</i> , <i>P. freii</i> , <i>P. christenseniae</i> , <i>P. viridicatum</i> , <i>P. nooechinulatum</i> , <i>P. melanoconidium</i> , <i>P. cyclopium</i> , <i>P. sublectaticum</i> , <i>P. mali-pumilae</i> .                                                                                                                                                                                                                                                                                                                                                                     |
|                     | Q 181    | <i>P. olsonii</i> , <i>P. granulatum</i> , <i>P. chrysogenum</i> , <i>P. camemberti</i> , <i>P. allii-sativi</i> , <i>P. griseofulvum</i> , <i>P. flavigenum</i> , <i>P. crustosum</i> , <i>P. rubens</i> , <i>P. aethiopicum</i> .                                                                                                                                                                                                                                                                                                                                                                                                    | <i>P. chrysogenum</i> , <i>P. rubens</i> , <i>P. glycyrrhizicola</i> .                                                                                                                                                                                                                                                                                                                                                                                                                                                                                                                                                                         |
| Genus               | Isolates | Species resulting from the BLAST analysis of the amplified regions                                                                                                                                                                                                                                                                                                                                                                                                                                                                                                                                                                     |                                                                                                                                                                                                                                                                                                                                                                                                                                                                                                                                                                                                                                                |
|                     |          | ITS                                                                                                                                                                                                                                                                                                                                                                                                                                                                                                                                                                                                                                    | ACT                                                                                                                                                                                                                                                                                                                                                                                                                                                                                                                                                                                                                                            |
| <i>Cladosporium</i> | Q 55     | <i>C. pseudocladosporioides</i> , <i>C. westerdijkiae</i> , <i>C. cladosporioides</i> , <i>C. asperulatum</i> , <i>C. perangustum</i> , <i>C. allicinum</i> , <i>C. uwebraunianum</i> , <i>C. delicatulum</i> , <i>C. inversicolor</i> , <i>C. subuliforme</i> , <i>C. tenuissima</i> , <i>C. oryzae</i> , <i>C. montecillanum</i> , <i>C. phyllophilum</i> , <i>C. europaeum</i> .                                                                                                                                                                                                                                                    | <i>C. cladosporioides</i> , <i>C. anthropophilum</i> .                                                                                                                                                                                                                                                                                                                                                                                                                                                                                                                                                                                         |
|                     | Q 61     | <i>C. allicinum</i> , <i>C. herbarum</i> , <i>C. ramotenellum</i> , <i>C. iridiscucumerinum</i>                                                                                                                                                                                                                                                                                                                                                                                                                                                                                                                                        | <i>C. allicinum</i> , <i>C. bruhnei</i> .                                                                                                                                                                                                                                                                                                                                                                                                                                                                                                                                                                                                      |



|                     |                 |                                                                                                                                                                                                                                                                                                                                                                                       |                                                                                                                                                                                     |
|---------------------|-----------------|---------------------------------------------------------------------------------------------------------------------------------------------------------------------------------------------------------------------------------------------------------------------------------------------------------------------------------------------------------------------------------------|-------------------------------------------------------------------------------------------------------------------------------------------------------------------------------------|
|                     | Q 77            | <i>C. allicinum</i> , <i>C. herbarum</i> , <i>C. parasubtilissimum</i> , <i>C. iridis</i> , <i>C. floccosum</i> , <i>C. sinuosum</i> , <i>C. macrocarpum</i> .                                                                                                                                                                                                                        | <i>C. parasubtilissimum</i> , <i>C. allicinum</i> , <i>C. herbarum</i> , <i>C. subtilissimum</i> , <i>C. bruhnei</i> , <i>C. antarcticum</i> , <i>C. versiforme</i> .               |
|                     | Q 92            | <i>C. pseudocladosporioides</i> , <i>C. cladosporioides</i> , <i>C. funiculosus</i> , <i>C. perangustum</i> , <i>C. rectoides</i> , <i>C. uwebraunianum</i> , <i>C. inversicolor</i> , <i>C. subuliforme</i> , <i>C. tenuissimum</i> , <i>C. westerdijkiae</i> , <i>C. phyllophilum</i> , <i>C. delicatulum</i> .                                                                     | <i>C. pseudocladosporioides</i> , <i>C. cladosporioides</i> , <i>C. funiculosus</i> , <i>C. halotolerans</i> .                                                                      |
|                     | Q 111           | <i>C. pseudocladosporioides</i> , <i>C. cladosporioides</i> , <i>C. funiculosus</i> , <i>C. perangustum</i> , <i>C. rectoides</i> , <i>C. westerdijkiae</i> , <i>C. asperulatum</i> , <i>C. allicinum</i> , <i>C. uwebraunianum</i> , <i>C. delicatulum</i> , <i>C. inversicolor</i> , <i>C. subuliforme</i> , <i>C. tenuissimum</i> , <i>C. phyllophilum</i> , <i>C. europaeum</i> . | <i>C. uwebraunianum</i> , <i>C. pseudocladosporioides</i> , <i>C. australiense</i> , <i>C. angustisporum</i> , <i>C. phaenocoma</i> , <i>C. gamsianum</i> , <i>C. needhamense</i> . |
|                     | Q 131           | <i>C. pseudocladosporioides</i> , <i>C. cladosporioides</i> , <i>C. westerdijkiae</i> , <i>C. asperulatum</i> , <i>C. perangustum</i> , <i>C. allicinum</i> , <i>C. uwebraunianum</i> , <i>C. delicatulum</i> , <i>C. inversicolor</i> , <i>C. subuliforme</i> , <i>C. tenuissimum</i> , <i>C. montecillanum</i> , <i>C. europaeum</i> .                                              | <i>C. pseudocladosporioides</i> , <i>C. cladosporioides</i> , <i>C. funiculosus</i> , <i>C. halotolerans</i> , <i>C. endoviticola</i> .                                             |
| <i>Cladosporium</i> | Q 162           | <i>C. pseudocladosporioides</i> , <i>C. cladosporioides</i> , <i>C. funiculosus</i> , <i>C. perangustum</i> , <i>C. rectoides</i> , <i>C. westerdijkiae</i> , <i>C. asperulatum</i> , <i>C. allicinum</i> , <i>C. uwebraunianum</i> , <i>C. delicatulum</i> , <i>C. inversicolor</i> , <i>C. tenuissimum</i> , <i>C. oryzae</i> , <i>C. phyllophilum</i> .                            | <i>C. cladosporioides</i> , <i>C. anthropophilum</i> .                                                                                                                              |
| <b>Genus</b>        | <b>Isolates</b> | <b>Species resulting from the BLAST analysis of the amplified regions</b>                                                                                                                                                                                                                                                                                                             |                                                                                                                                                                                     |
|                     |                 | <b><i>BenA</i></b>                                                                                                                                                                                                                                                                                                                                                                    | <b><i>CaM</i></b>                                                                                                                                                                   |
| <i>Aspergillus</i>  | Q 29            | <i>A. jensenii</i> , <i>A. creber</i> , <i>A. cojetkovicii</i>                                                                                                                                                                                                                                                                                                                        | <i>A. jensenii</i> , <i>A. creber</i> , <i>A. cojetkovicii</i> .                                                                                                                    |
|                     | Q 49            | <i>A. fumigatus</i>                                                                                                                                                                                                                                                                                                                                                                   | <i>A. fumigatus</i>                                                                                                                                                                 |
|                     | Q 73            | <i>A. tubingensis</i>                                                                                                                                                                                                                                                                                                                                                                 | <i>A. tubingensis</i> , <i>A. niger</i> , <i>A. phoenicis</i>                                                                                                                       |
|                     | Q 146           | <i>A. flavus</i>                                                                                                                                                                                                                                                                                                                                                                      | <i>A. flavus</i>                                                                                                                                                                    |
| <b>Genus</b>        | <b>Isolates</b> | <b>Species resulting from the BLAST analysis of the amplified regions</b>                                                                                                                                                                                                                                                                                                             |                                                                                                                                                                                     |
|                     |                 | <b><i>TEF1-a</i></b>                                                                                                                                                                                                                                                                                                                                                                  |                                                                                                                                                                                     |
| <i>Fusarium</i>     | Q 185           | <i>F. oxysporum</i>                                                                                                                                                                                                                                                                                                                                                                   |                                                                                                                                                                                     |

**Bold type:** species that gave the maximum similarity with the blasted sequence. **Gray highlighter:** species confirmed by the subsequent phylogenetic analysis

**Table S11.** Secondary metabolites detected in the freeze-dried culture of the isolates Q 146 of *Aspergillus flavus* obtained from marketed quinoa (*Chenopodium quinoa* Willd.) seed samples and grown on Czapek Yeast Autolysate (CYA) Agar medium.

| <i>Aspergillus</i> secondary metabolites | µg Kg <sup>-1</sup> |
|------------------------------------------|---------------------|
| <b>Aflatoxins</b>                        |                     |
| Aflatoxicol                              | 551                 |
| Aflatoxin B1                             | 64200               |
| Aflatoxin B2                             | 4860                |
| Aflatoxin M1                             | 1500                |
| Aflatoxin P1                             | 114                 |
| O-Methyl sterigmatocystin                | 367                 |
| Methoxysterigmatocystin                  | 1                   |
| Sterigmatocystin                         | 35.3                |
| <b>Anthraquinoids</b>                    |                     |
| Averantin                                | 435                 |
| Averufin                                 | 520                 |
| Norsolorinic acid                        | 143                 |
| <b>Dihydrobenzofuran derivative</b>      |                     |
| Asperfuran                               | 632                 |
| <b>Diketopiperazines</b>                 |                     |
| Brevianimide F                           | 9170                |
| Cyclo (L-Pro_L-Tyr)                      | 41700               |
| Cyclo (L-Pro_L-Val)                      | 19700               |
| <b>Koningic acid</b>                     |                     |
| Heptelidic acid                          | 202000              |
| <b>Propionic acids</b>                   |                     |
| 3-Nitropropionic acid                    | 1970000             |
| <b>Pyrones</b>                           |                     |
| Kojic acid                               | 92800               |
| <b>Sesquiterpenes</b>                    |                     |
| Sporogea AO                              | 7130                |
| <b>Versicolorin</b>                      |                     |
| Versicolorin A                           | 262                 |
| Versicolorin C                           | 919                 |
| Versiconal Acetate                       | 51.6                |
| Versiconol                               | 4020                |
